# Supplementary material for: Deep cerebellar tFUS engages cortical circuits via convergent local and sensory-driven mechanisms
Source: Research Square preprint supplement (doi:10.21203/rs.3.rs-8129088/v1), 2025-12-16
Supplement: Supplementary file [file 81b77b2e30819602a7233c7e.pdf]

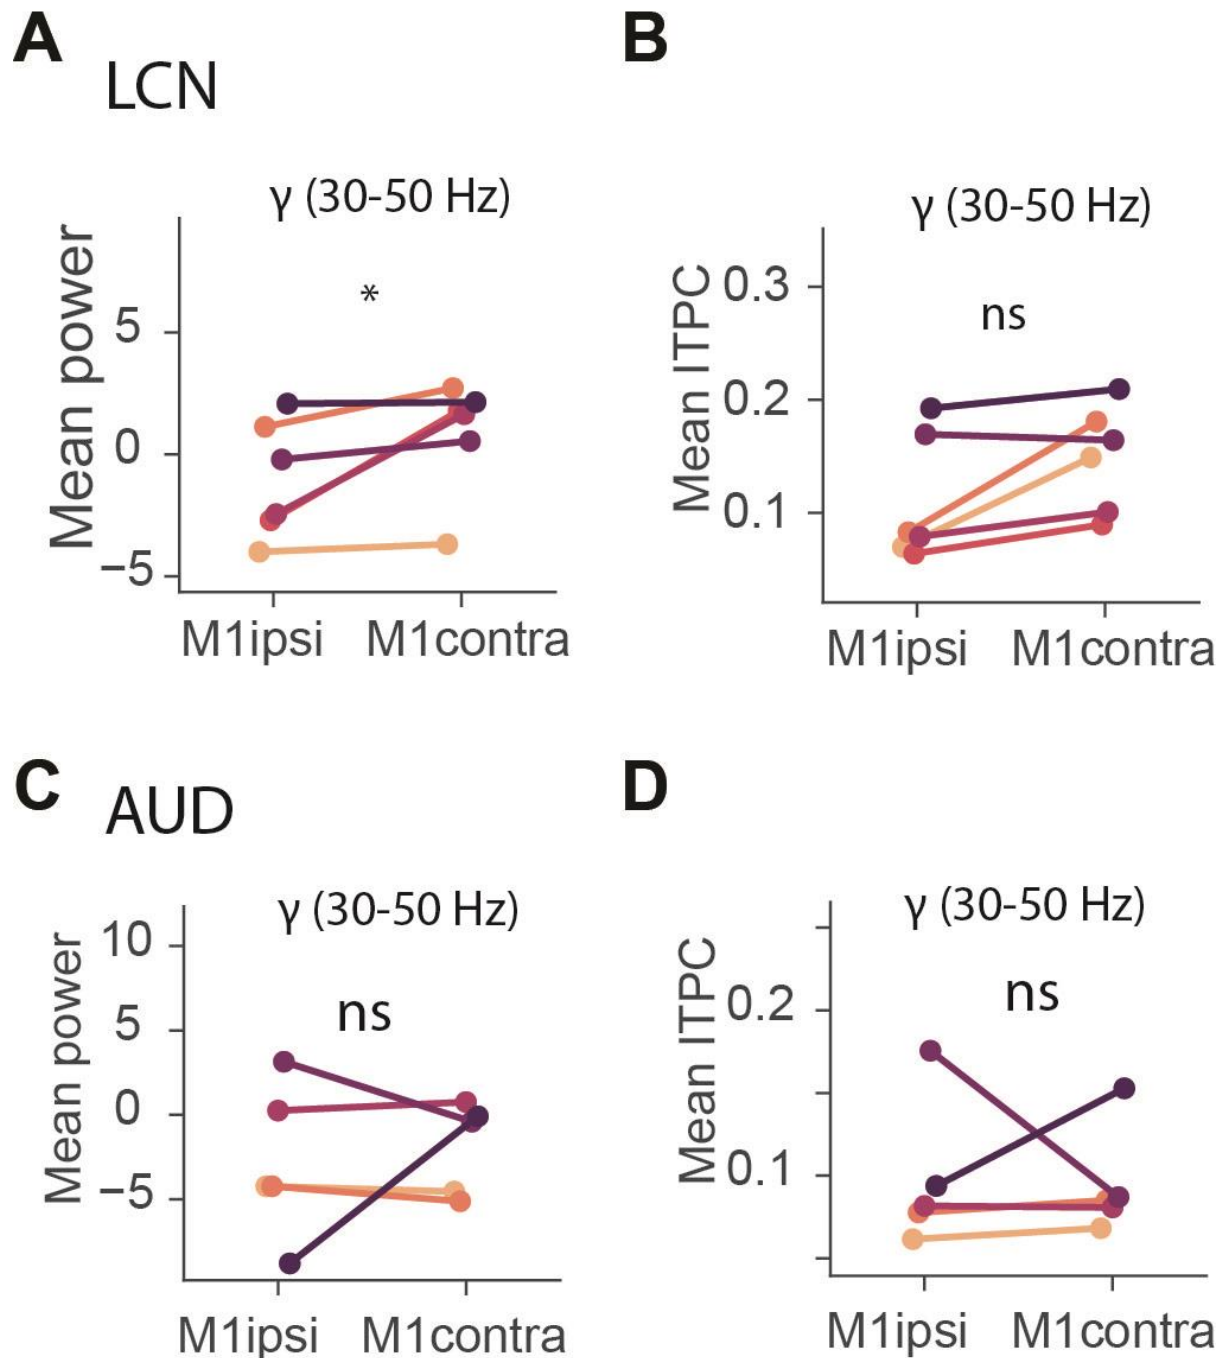

**Figure S1**

A) Quantitative comparison of average spectral power between contralateral and ipsilateral M1 in gamma band (30-50 Hz) within 0-0.2s post-stimulation window for LCN session. Each dot represents one rat (n=6) with connecting lines showing paired measurements (Wilcoxon signed-rank test. \* $p < 0.05$ ).

B) Same as panel A but for ITPC values, quantifying phase consistency across trials within gamma band within 0-0.2s post-stimulation window for LCN session (Wilcoxon signed-rank test.  $p = 0.06$ ).

C) Quantitative comparison of average spectral power between contralateral and ipsilateral M1 in gamma band (30-50 Hz) within 0-0.2s post-stimulation window for AUD session. Each dot represents one rat (n=5) with connecting lines showing paired measurements (Wilcoxon signed-rank test, no significant).

D) Same as panel B but for ITPC values, quantifying phase consistency across trials within gamma band within 0-0.2s post-stimulation window for AUD session. (Wilcoxon signed-rank test, no significant).
